# Supplementary material
Source: MDPI journal article supplement (https://www.mdpi.com/2071-1050/10/9/3124)
Supplement: s1 [file s1]

Supplementary Table 1. Survey instrument used during interviews in 8 communities in Arctic Alaska ( $n = 64$ ) and Canada (Churchill  $n = 17$  and Nunavut  $n = 50$ ) in 2013.

1. *We are trying to learn where hunters get their information about animal numbers and locations. Which sources do you trust or not trust regarding information about resource abundance?, [i.e. information about abundance and number for that resource, must be linked to the most important resource mentioned in 9A]*

#### Alaska

| Source                                                                                    | Yes | No | NA | Don't know |
|-------------------------------------------------------------------------------------------|-----|----|----|------------|
| Other people within your household                                                        |     |    |    |            |
| Hunters from the community                                                                |     |    |    |            |
| Hunters from outside the community                                                        |     |    |    |            |
| Elders who still hunt                                                                     |     |    |    |            |
| Elders who hunted in the past but don't any longer                                        |     |    |    |            |
| Newspaper/internet articles                                                               |     |    |    |            |
| Fish and Game biologists (biological based)                                               |     |    |    |            |
| Wildlife troopers (legal authority)                                                       |     |    |    |            |
| NGOs (Sierra Club, Defenders of Wildlife)                                                 |     |    |    |            |
| Hunters associations (Alaska Outdoor Council, Safari Club)                                |     |    |    |            |
| Working groups (ex. Western Arctic Caribou Working Group)                                 |     |    |    |            |
| Co-management groups (ex. WAH working group, Alaska Migratory Bird Co-management council) |     |    |    |            |

#### Canada

| Source                                                                                                        | Reliable | Not reliable |
|---------------------------------------------------------------------------------------------------------------|----------|--------------|
| Personal experience either yours or others within your household                                              |          |              |
| Other hunters from the community                                                                              |          |              |
| Other hunters from outside the community                                                                      |          |              |
| Elders                                                                                                        |          |              |
| Other resource users                                                                                          |          |              |
| Newspaper articles                                                                                            |          |              |
| Wildlife biologists (biological based)                                                                        |          |              |
| Wildlife Officers (legal authority)                                                                           |          |              |
| NGOs                                                                                                          |          |              |
| Hunters and Trappers Organizations                                                                            |          |              |
| Others e.g.: Regional Wildlife Board, Territorial Government, Federal Government, international organizations |          |              |

2. We would like to know more about trust in different institutions/bodies at different levels. Below we have listed 2 levels and industry as a separate category. We ask you to rank your trust on a scale from 1 to 7 where 1 means no trust at all and 7 means high level of trust. [institutions are special for each country]. Eventually trust was categorized as no (1-3), partial (4), and yes (5-7).

**Alaska**

[illegible]

[illegible]

## Canada agencies

[illegible]



|                                   |  |  |  |  |  |  |  |  |  |
|-----------------------------------|--|--|--|--|--|--|--|--|--|
| Other ex: company Liason officers |  |  |  |  |  |  |  |  |  |
|-----------------------------------|--|--|--|--|--|--|--|--|--|

3. *What are the two most important institutions mentioned above in relation to your community?*

**[specify]**\_\_\_\_\_

*Why are this/these institutions the most important ones?*

\_\_\_\_\_

Supplementary Table 2. Characteristics of organizations used in our research with the number of interviewee responses ( $n = 131$ ). National organization have management at the highest level and this is where all decisions are made, followed by sub-national (Sub-nat.) which can have regional offices throughout the state and these regions can be run differently, and local is the level closest to the individual level.

| Region   | Organization                           | Scale    | Elected | Indigenous | Fish and wildlife | Industry | Legal authority | <i>n</i> |
|----------|----------------------------------------|----------|---------|------------|-------------------|----------|-----------------|----------|
| Alaska   | Federal Subsistence Management         | National | No      | No         | Yes               | No       | Yes             | 33       |
|          | Other Federal Agencies                 | National | No      | No         | No                | No       | Yes             | 39       |
|          | Misc. Industry                         | National | No      | No         | No                | Yes      | No              | 64       |
|          | Regional Advisory Committees (RAC)     | Sub-nat. | Yes     | No         | Yes               | No       | No              | 30       |
|          | Division of Subsistence                | Sub-nat. | No      | No         | Yes               | No       | No              | 41       |
|          | Fish and Game                          | Sub-nat. | No      | No         | Yes               | No       | Yes             | 44       |
|          | Other State Agencies                   | Sub-nat. | No      | No         | No                | No       | Yes             | 36       |
|          | Advisory committee (AC)                | Sub-nat. | Yes     | No         | Yes               | No       | No              | 34       |
|          | Alaska Federation of Natives (AFN)     | Sub-nat. | Yes     | Yes        | No                | No       | No              | 49       |
|          | Regional Native corporation            | Sub-nat. | No      | Yes        | No                | No       | No              | 55       |
|          | Working Group                          | Sub-nat. | Yes     | No         | Yes               | No       | No              | 34       |
|          | Tribal council                         | Local    | Yes     | Yes        | No                | No       | No              | 54       |
|          | City council                           | Local    | Yes     | Yes        | No                | No       | Yes             | 41       |
| Canada   | Federal government                     | National | Yes     | No         | No                | No       | Yes             | 53       |
|          | Aboriginal Affairs and Northern        | National | Yes     | Yes        | Yes               | No       | No              | 50       |
|          | Misc. Industry                         | National | No      | No         | No                | Yes      | No              | 59       |
| Manitoba | Department of Fisheries and Ocean      | National | Yes     | No         | Yes               | No       | Yes             | 15       |
|          | Government of Canada -Health Care      | National | Yes     | No         | No                | No       | Yes             | 14       |
|          | Human Resources and Social Development |          |         |            |                   |          |                 |          |
|          | Parks Canada Agency                    | National | Yes     | No         | Yes               | No       | Yes             | 12       |
|          | Natural Resource Canada                | National | Yes     | No         | Yes               | No       | Yes             | 12       |
|          | Province of Manitoba                   | Sub-nat. | Yes     | No         | No                | No       | Yes             | 14       |
|          | Manitoba conservation                  | Sub-nat. | Yes     | No         | Yes               | No       | Yes             | 15       |

| Region  | Organization                       | Scale    | Elected | Indigenous | Fish and<br>wildlife | Industry | Legal<br>authority | <i>n</i> |
|---------|------------------------------------|----------|---------|------------|----------------------|----------|--------------------|----------|
| Nunavut | Other-Provencal                    | Sub-nat. | Yes     | No         | No                   | No       | No                 | 4        |
|         | Town                               | Local    | Yes     | No         | No                   | No       | Yes                | 14       |
|         | Other -Local                       | Local    | No      | No         | No                   | No       | No                 | 16       |
|         | Churchill Northern Studies Centre  | Local    | No      | No         | No                   | No       | No                 | 5        |
|         | Hudson Bay Railway                 | Local    | No      | No         | No                   | Yes      | No                 | 2        |
|         | Port of Churchill                  | Local    | No      | No         | No                   | Yes      | No                 | 13       |
|         | Manitoba Hydro                     | Local    | No      | No         | No                   | Yes      | No                 | 11       |
|         | Inuit Tapirit Kanatami             | National | Yes     | Yes        | No                   | No       | No                 | 38       |
|         | Government of Nunavut              | Sub-nat. | Yes     | No         | No                   | No       | Yes                | 45       |
|         | Institutions of Public Government  | Sub-nat. | Yes     | No         | Yes                  | No       | No                 | 40       |
|         | Kivalliq Inuit Association         | Sub-nat. | Yes     | Yes        | Yes                  | No       | No                 | 46       |
|         | Kivalliq Wildlife Board            | Sub-nat. | Yes     | Yes        | Yes                  | No       | No                 | 41       |
|         | Nunavut Tunngavik Incorporated     | Sub-nat. | Yes     | Yes        | No                   | No       | No                 | 44       |
|         | Elders                             | Local    | No      | Yes        | Yes                  | No       | No                 | 45       |
|         | Hamlet                             | Local    | Yes     | Yes        | No                   | No       | Yes                | 46       |
|         | Hunters and Trappers Organizations | Local    | Yes     | Yes        | Yes                  | No       | No                 | 45       |



Supplementary Table 3. Characteristics of interviewees from interviews conducted in Alaska and Canada (Churchill and Nunavut) in 2013. These characteristics were chosen because they are often collected on basic census forms and used to compose community profiles and have been associated with trust.

| Individual | Parameter        | Alaska | Churchill | Nunavut |
|------------|------------------|--------|-----------|---------|
| Region     |                  | 64     | 17        | 50      |
| Education  |                  |        |           |         |
|            | No School        | 1      | 1         | 16      |
|            | Primary          | 13     | 3         | 14      |
|            | Secondary        | 35     | 9         | 17      |
|            | Post-Secondary   | 9      | 4         | 3       |
| Residency  |                  |        |           |         |
|            | Less than 10 yrs | 1      | 0         | 2       |
|            | 11-20 yrs        | 2      | 1         | 1       |
|            | 21-30 yrs        | 9      | 4         | 10      |
|            | More than 30 yrs | 46     | 12        | 37      |
| Marital    |                  |        |           |         |
|            | Single*          | 13     | 6         | 7       |
|            | Married**        | 27     | 10        | 31      |
|            | Divorced         | 3      | 0         | 2       |
|            | Widowed          | 14     | 1         | 10      |
| Gender     |                  |        |           |         |
|            | Male             | 34     | 13        | 38      |
|            | Female           | 30     | 4         | 12      |
| Age        |                  |        |           |         |
|            | Youth            | 33     | 10        | 24      |
|            | Elder            | 31     | 7         | 26      |

\* includes individuals separated

\*\* includes common law and par
